# Supplementary material
Source: publisher figshare collection journal article supplement (https://acs.figshare.com/ndownloader/files/4167736)
Supplement: Supplementary file 1 [file 4167736]

 
data_jiao 
 
_audit_creation_method            SHELXL-97 
_chemical_name_systematic 
; 
 ? 
; 
_chemical_name_common             ? 
_chemical_melting_point           ? 
_chemical_formula_moiety          ? 
_chemical_formula_sum 
 'C21 H22 Co2 N3 O11' 
_chemical_formula_weight          610.28 
 
loop_ 
 _atom_type_symbol 
 _atom_type_description 
 _atom_type_scat_dispersion_real 
 _atom_type_scat_dispersion_imag 
 _atom_type_scat_source 
 'C'  'C'   0.0033   0.0016 
 'International Tables Vol C Tables 4.2.6.8 and 6.1.1.4' 
 'H'  'H'   0.0000   0.0000 
 'International Tables Vol C Tables 4.2.6.8 and 6.1.1.4' 
 'N'  'N'   0.0061   0.0033 
 'International Tables Vol C Tables 4.2.6.8 and 6.1.1.4' 
 'O'  'O'   0.0106   0.0060 
 'International Tables Vol C Tables 4.2.6.8 and 6.1.1.4' 
 'Co'  'Co'   0.3494   0.9721 
 'International Tables Vol C Tables 4.2.6.8 and 6.1.1.4' 
 
_symmetry_cell_setting            orthorhombic
_symmetry_space_group_name_H-M    Pbcn 
 
loop_ 
 _symmetry_equiv_pos_as_xyz 
 'x, y, z' 
 '-x+1/2, -y+1/2, z+1/2' 
 '-x, y, -z+1/2' 
 'x+1/2, -y+1/2, -z' 
 '-x, -y, -z' 
 'x-1/2, y-1/2, -z-1/2' 
 'x, -y, z-1/2' 
 '-x-1/2, y-1/2, z' 
 
_cell_length_a                    23.695(4) 
_cell_length_b                    10.2775(18) 
_cell_length_c                    9.9729(18) 
_cell_angle_alpha                 90.00 
_cell_angle_beta                  90.00 
_cell_angle_gamma                 90.00 
_cell_volume                      2428.7(7) 
_cell_formula_units_Z             4 
_cell_measurement_temperature     293(2) 
_cell_measurement_reflns_used     2506
_cell_measurement_theta_min       3.25
_cell_measurement_theta_max       26.73 
 
_exptl_crystal_description        'block' 
_exptl_crystal_colour             'red' 
_exptl_crystal_size_max           0.62 
_exptl_crystal_size_mid           0.24 
_exptl_crystal_size_min           0.04 
_exptl_crystal_density_meas       ? 
_exptl_crystal_density_diffrn     1.669 
_exptl_crystal_density_method     'not measured' 
_exptl_crystal_F_000              1244 
_exptl_absorpt_coefficient_mu     1.431 
_exptl_absorpt_correction_type    multi-scan
_exptl_absorpt_correction_T_min   0.4682 
_exptl_absorpt_correction_T_max   0.9450 
_exptl_absorpt_process_details    'SADABS'
 
_exptl_special_details 
; 
 ? 
; 
 
_diffrn_ambient_temperature       293(2) 
_diffrn_radiation_wavelength      0.71073 
_diffrn_radiation_type            MoK\a 
_diffrn_radiation_source          'fine-focus sealed tube' 
_diffrn_radiation_monochromator   graphite 
_diffrn_measurement_device_type   'Smart Apex II CCD'
_diffrn_measurement_method        'omega scans'
_diffrn_detector_area_resol_mean  ? 
_diffrn_standards_number          ? 
_diffrn_standards_interval_count  ? 
_diffrn_standards_interval_time   ? 
_diffrn_standards_decay_%         ? 
_diffrn_reflns_number             12576 
_diffrn_reflns_av_R_equivalents   0.0447 
_diffrn_reflns_av_sigmaI/netI     0.0339 
_diffrn_reflns_limit_h_min        -27 
_diffrn_reflns_limit_h_max        29 
_diffrn_reflns_limit_k_min        -9 
_diffrn_reflns_limit_k_max        13 
_diffrn_reflns_limit_l_min        -12 
_diffrn_reflns_limit_l_max        12 
_diffrn_reflns_theta_min          3.25 
_diffrn_reflns_theta_max          26.73 
_reflns_number_total              2573 
_reflns_number_gt                 1978 
_reflns_threshold_expression      >2sigma(I) 
 
_computing_data_collection        'Bruker SMART' 
_computing_cell_refinement        'Bruker SMART' 
_computing_data_reduction         'Bruker SHELXTL'
_computing_structure_solution     'SHELXS-97 (Sheldrick, 1990)' 
_computing_structure_refinement   'SHELXL-97 (Sheldrick, 1997)' 
_computing_molecular_graphics     'Bruker SHELXTL' 
_computing_publication_material   'Bruker SHELXTL'
 
_refine_special_details 
; 
 Refinement of F^2^ against ALL reflections.  The weighted R-factor wR and 
 goodness of fit S are based on F^2^, conventional R-factors R are based 
 on F, with F set to zero for negative F^2^. The threshold expression of 
 F^2^ > 2sigma(F^2^) is used only for calculating R-factors(gt) etc. and is 
 not relevant to the choice of reflections for refinement.  R-factors based 
 on F^2^ are statistically about twice as large as those based on F, and R- 
 factors based on ALL data will be even larger. 
; 
 
_refine_ls_structure_factor_coef  Fsqd  
_refine_ls_matrix_type            full 
_refine_ls_weighting_scheme       calc  
_refine_ls_weighting_details 
 'calc w=1/[\s^2^(Fo^2^)+(0.0866P)^2^+1.9553P] where P=(Fo^2^+2Fc^2^)/3' 
_atom_sites_solution_primary      direct 
_atom_sites_solution_secondary    difmap 
_atom_sites_solution_hydrogens    geom 
_refine_ls_hydrogen_treatment     constr 
_refine_ls_extinction_method      none 
_refine_ls_extinction_coef        ? 
_refine_ls_number_reflns          2573 
_refine_ls_number_parameters      157 
_refine_ls_number_restraints      2 
_refine_ls_R_factor_all           0.0627 
_refine_ls_R_factor_gt            0.0470 
_refine_ls_wR_factor_ref          0.1563 
_refine_ls_wR_factor_gt           0.1439 
_refine_ls_goodness_of_fit_ref    1.098 
_refine_ls_restrained_S_all       1.099 
_refine_ls_shift/su_max           0.001 
_refine_ls_shift/su_mean          0.000 
 
loop_ 
 _atom_site_label 
 _atom_site_type_symbol 
 _atom_site_fract_x 
 _atom_site_fract_y 
 _atom_site_fract_z 
 _atom_site_U_iso_or_equiv 
 _atom_site_adp_type 
 _atom_site_occupancy 
 _atom_site_symmetry_multiplicity 
 _atom_site_calc_flag 
 _atom_site_refinement_flags 
 _atom_site_disorder_assembly 
 _atom_site_disorder_group 
N1 N 0.63446(12) 0.8476(3) 0.0964(3) 0.0316(7) Uani 1 1 d . . . 
Co1 Co 0.713769(19) 0.79108(5) 0.01243(5) 0.0266(2) Uani 1 1 d . . . 
C1 C 0.83205(16) 0.7070(4) 0.0931(4) 0.0349(9) Uani 1 1 d . . . 
H1A H 0.8660 0.7559 0.1131 0.042 Uiso 1 1 calc R . . 
H1B H 0.8431 0.6179 0.0749 0.042 Uiso 1 1 calc R . . 
C2 C 0.79413(15) 0.7089(3) 0.2144(4) 0.0301(8) Uani 1 1 d . . . 
C3 C 0.79445(16) 0.9983(4) -0.0134(4) 0.0337(9) Uani 1 1 d . . . 
C4 C 0.82809(15) 0.8834(4) -0.0678(4) 0.0357(9) Uani 1 1 d . . . 
H4A H 0.8277 0.8865 -0.1650 0.043 Uiso 1 1 calc R . . 
H4B H 0.8670 0.8913 -0.0387 0.043 Uiso 1 1 calc R . . 
C5 C 0.58648(17) 0.8304(5) 0.0262(4) 0.0434(10) Uani 1 1 d . . . 
H5A H 0.5892 0.8094 -0.0643 0.052 Uiso 1 1 calc R . . 
C6 C 0.53396(16) 0.8426(5) 0.0819(4) 0.0460(11) Uani 1 1 d . . . 
H6A H 0.5020 0.8297 0.0293 0.055 Uiso 1 1 calc R . . 
C7 C 0.52804(14) 0.8742(4) 0.2171(4) 0.0325(8) Uani 1 1 d . . . 
C8 C 0.57788(15) 0.8962(4) 0.2868(4) 0.0351(9) Uani 1 1 d . . . 
H8A H 0.5764 0.9200 0.3767 0.042 Uiso 1 1 calc R . . 
C9 C 0.62946(15) 0.8831(4) 0.2244(4) 0.0326(8) Uani 1 1 d . . . 
H9A H 0.6620 0.8997 0.2735 0.039 Uiso 1 1 calc R . . 
O1 O 0.80644(11) 0.7604(3) -0.0249(3) 0.0300(6) Uani 1 1 d . . . 
O2 O 0.74398(11) 0.7464(3) 0.1999(3) 0.0382(6) Uani 1 1 d . . . 
O3 O 0.68117(12) 0.6064(3) -0.0183(3) 0.0433(7) Uani 1 1 d . . . 
O4 O 0.68389(11) 0.8296(3) -0.1798(3) 0.0404(7) Uani 1 1 d . . . 
O5 O 0.74545(11) 0.9777(3) 0.0276(3) 0.0423(7) Uani 1 1 d . . . 
N2 N 0.5000 0.5540(19) -0.2500 0.173(5) Uiso 1 2 d SD . . 
C11 C 0.5000 0.689(2) -0.2500 0.272(13) Uiso 1 2 d SD . . 
C10 C 0.4475(8) 0.503(2) -0.2401(16) 0.294(11) Uiso 1 1 d . . . 
H10A H 0.4498 0.4096 -0.2407 0.441 Uiso 1 1 calc R . . 
H10B H 0.4250 0.5315 -0.3145 0.441 Uiso 1 1 calc R . . 
H10C H 0.4304 0.5312 -0.1579 0.441 Uiso 1 1 calc R . . 
O6 O 0.4701(8) 0.7749(17) -0.219(2) 0.221(9) Uiso 0.50 1 d PD . . 
 
loop_ 
 _atom_site_aniso_label 
 _atom_site_aniso_U_11 
 _atom_site_aniso_U_22 
 _atom_site_aniso_U_33 
 _atom_site_aniso_U_23 
 _atom_site_aniso_U_13 
 _atom_site_aniso_U_12 
N1 0.0247(15) 0.0343(17) 0.0357(17) 0.0040(13) 0.0038(13) 0.0024(12) 
Co1 0.0218(3) 0.0308(3) 0.0272(3) 0.00142(19) 0.00250(17) 0.00178(18) 
C1 0.0274(18) 0.040(2) 0.037(2) 0.0038(17) -0.0009(16) 0.0030(15) 
C2 0.0287(19) 0.0311(19) 0.030(2) -0.0024(15) -0.0001(15) 0.0018(14) 
C3 0.031(2) 0.035(2) 0.035(2) 0.0000(16) 0.0018(15) -0.0008(16) 
C4 0.0293(19) 0.035(2) 0.043(2) 0.0003(17) 0.0085(17) -0.0043(16) 
C5 0.028(2) 0.075(3) 0.028(2) -0.005(2) 0.0029(15) -0.004(2) 
C6 0.0221(18) 0.081(3) 0.035(2) -0.006(2) -0.0019(16) -0.0024(19) 
C7 0.0209(17) 0.044(2) 0.032(2) 0.0012(16) 0.0048(14) 0.0013(15) 
C8 0.0294(19) 0.047(2) 0.029(2) -0.0077(16) 0.0025(15) 0.0017(16) 
C9 0.0234(18) 0.038(2) 0.037(2) -0.0022(16) 0.0014(14) -0.0017(15) 
O1 0.0288(14) 0.0298(13) 0.0315(14) 0.0015(10) 0.0034(11) 0.0011(11) 
O2 0.0298(14) 0.0544(16) 0.0306(15) 0.0027(12) 0.0019(11) 0.0093(12) 
O3 0.0349(16) 0.0313(15) 0.064(2) -0.0013(13) -0.0064(13) 0.0034(12) 
O4 0.0380(15) 0.0552(17) 0.0281(14) 0.0025(12) 0.0055(12) 0.0125(13) 
O5 0.0292(15) 0.0353(16) 0.062(2) -0.0058(13) 0.0137(13) -0.0012(11) 
 
_geom_special_details 
; 
 All esds (except the esd in the dihedral angle between two l.s. planes) 
 are estimated using the full covariance matrix.  The cell esds are taken 
 into account individually in the estimation of esds in distances, angles 
 and torsion angles; correlations between esds in cell parameters are only 
 used when they are defined by crystal symmetry.  An approximate (isotropic) 
 treatment of cell esds is used for estimating esds involving l.s. planes. 
; 
 
loop_ 
 _geom_bond_atom_site_label_1 
 _geom_bond_atom_site_label_2 
 _geom_bond_distance 
 _geom_bond_site_symmetry_2 
 _geom_bond_publ_flag 
N1 C9 1.333(5) . ? 
N1 C5 1.347(5) . ? 
N1 Co1 2.138(3) . ? 
Co1 O2 2.054(3) . ? 
Co1 O5 2.066(3) . ? 
Co1 O3 2.072(3) . ? 
Co1 O4 2.082(3) . ? 
Co1 O1 2.249(3) . ? 
C1 O1 1.432(5) . ? 
C1 C2 1.507(5) . ? 
C1 H1A 0.9700 . ? 
C1 H1B 0.9700 . ? 
C2 O4 1.241(5) 2_665 ? 
C2 O2 1.258(4) . ? 
C3 O5 1.249(5) . ? 
C3 O3 1.253(5) 8_765 ? 
C3 C4 1.525(5) . ? 
C4 O1 1.430(4) . ? 
C4 H4A 0.9700 . ? 
C4 H4B 0.9700 . ? 
C5 C6 1.369(6) . ? 
C5 H5A 0.9300 . ? 
C6 C7 1.394(6) . ? 
C6 H6A 0.9300 . ? 
C7 C8 1.389(5) . ? 
C7 C7 1.482(7) 3_655 ? 
C8 C9 1.378(5) . ? 
C8 H8A 0.9300 . ? 
C9 H9A 0.9300 . ? 
O3 C3 1.253(5) 8_755 ? 
O4 C2 1.241(5) 2_664 ? 
N2 C10 1.354(18) 3_654 ? 
N2 C10 1.354(18) . ? 
N2 C11 1.388(10) . ? 
C11 O6 1.174(9) 3_654 ? 
C11 O6 1.174(9) . ? 
C10 H10A 0.9600 . ? 
C10 H10B 0.9600 . ? 
C10 H10C 0.9600 . ? 
O6 O6 1.55(3) 3_654 ? 
 
loop_ 
 _geom_angle_atom_site_label_1 
 _geom_angle_atom_site_label_2 
 _geom_angle_atom_site_label_3 
 _geom_angle 
 _geom_angle_site_symmetry_1 
 _geom_angle_site_symmetry_3 
 _geom_angle_publ_flag 
C9 N1 C5 117.3(3) . . ? 
C9 N1 Co1 121.8(2) . . ? 
C5 N1 Co1 120.2(3) . . ? 
O2 Co1 O5 90.81(12) . . ? 
O2 Co1 O3 93.43(12) . . ? 
O5 Co1 O3 175.64(12) . . ? 
O2 Co1 O4 177.95(11) . . ? 
O5 Co1 O4 90.82(12) . . ? 
O3 Co1 O4 84.92(12) . . ? 
O2 Co1 N1 90.59(11) . . ? 
O5 Co1 N1 92.20(11) . . ? 
O3 Co1 N1 88.80(12) . . ? 
O4 Co1 N1 90.58(11) . . ? 
O2 Co1 O1 77.23(10) . . ? 
O5 Co1 O1 77.75(10) . . ? 
O3 Co1 O1 102.18(11) . . ? 
O4 Co1 O1 101.91(10) . . ? 
N1 Co1 O1 163.95(11) . . ? 
O1 C1 C2 113.7(3) . . ? 
O1 C1 H1A 108.8 . . ? 
C2 C1 H1A 108.8 . . ? 
O1 C1 H1B 108.8 . . ? 
C2 C1 H1B 108.8 . . ? 
H1A C1 H1B 107.7 . . ? 
O4 C2 O2 126.3(4) 2_665 . ? 
O4 C2 C1 115.3(3) 2_665 . ? 
O2 C2 C1 118.4(3) . . ? 
O5 C3 O3 126.3(4) . 8_765 ? 
O5 C3 C4 118.1(3) . . ? 
O3 C3 C4 115.6(3) 8_765 . ? 
O1 C4 C3 113.0(3) . . ? 
O1 C4 H4A 109.0 . . ? 
C3 C4 H4A 109.0 . . ? 
O1 C4 H4B 109.0 . . ? 
C3 C4 H4B 109.0 . . ? 
H4A C4 H4B 107.8 . . ? 
N1 C5 C6 123.0(4) . . ? 
N1 C5 H5A 118.5 . . ? 
C6 C5 H5A 118.5 . . ? 
C5 C6 C7 120.4(4) . . ? 
C5 C6 H6A 119.8 . . ? 
C7 C6 H6A 119.8 . . ? 
C8 C7 C6 115.9(3) . . ? 
C8 C7 C7 122.8(4) . 3_655 ? 
C6 C7 C7 121.2(4) . 3_655 ? 
C9 C8 C7 120.8(3) . . ? 
C9 C8 H8A 119.6 . . ? 
C7 C8 H8A 119.6 . . ? 
N1 C9 C8 122.5(3) . . ? 
N1 C9 H9A 118.7 . . ? 
C8 C9 H9A 118.7 . . ? 
C4 O1 C1 115.6(3) . . ? 
C4 O1 Co1 106.0(2) . . ? 
C1 O1 Co1 109.4(2) . . ? 
C2 O2 Co1 120.2(2) . . ? 
C3 O3 Co1 129.4(3) 8_755 . ? 
C2 O4 Co1 125.4(2) 2_664 . ? 
C3 O5 Co1 118.1(3) . . ? 
C10 N2 C10 134(3) 3_654 . ? 
C10 N2 C11 112.8(13) 3_654 . ? 
C10 N2 C11 112.8(13) . . ? 
O6 C11 O6 82(2) 3_654 . ? 
O6 C11 N2 138.8(11) 3_654 . ? 
O6 C11 N2 138.8(11) . . ? 
N2 C10 H10A 109.5 . . ? 
N2 C10 H10B 109.5 . . ? 
H10A C10 H10B 109.5 . . ? 
N2 C10 H10C 109.5 . . ? 
H10A C10 H10C 109.5 . . ? 
H10B C10 H10C 109.5 . . ? 
C11 O6 O6 48.8(11) . 3_654 ? 
 
_diffrn_measured_fraction_theta_max    0.997 
_diffrn_reflns_theta_full              26.73 
_diffrn_measured_fraction_theta_full   0.997 
_refine_diff_density_max    0.649 
_refine_diff_density_min   -0.776 
_refine_diff_density_rms    0.102 
